# Supplementary material for: Integrating cytogenetics and genomics in comparative evolutionary studies of cichlid fish
Source: PubMed Central journal article supplement (PMC3463429; doi:10.1186/1471-2164-13-463), 2012-09-09

**Additional file 1:** Metaphase spreads of cichlid species probed with BAC clones from *Oreochromis niloticus*. BACs containing markers of LG 1, 3, 5 and 7 were hybridized under FISH procedure and are indicated in different colors in each metaphase. The arrows indicate the chromosome position of probes. Scale bar 10 $\mu$ m.

*Oreochromis niloticus*

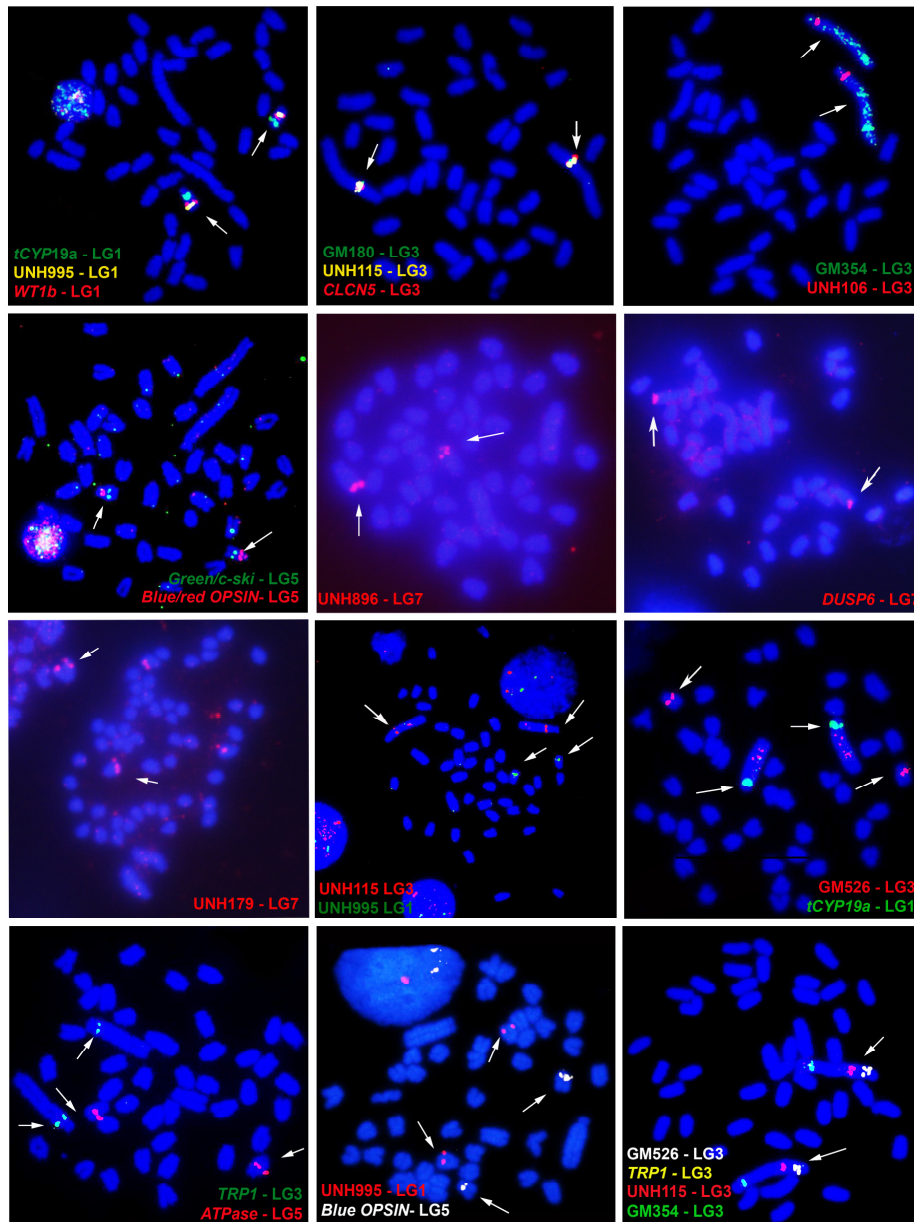

*Oreochromis mossambicus*

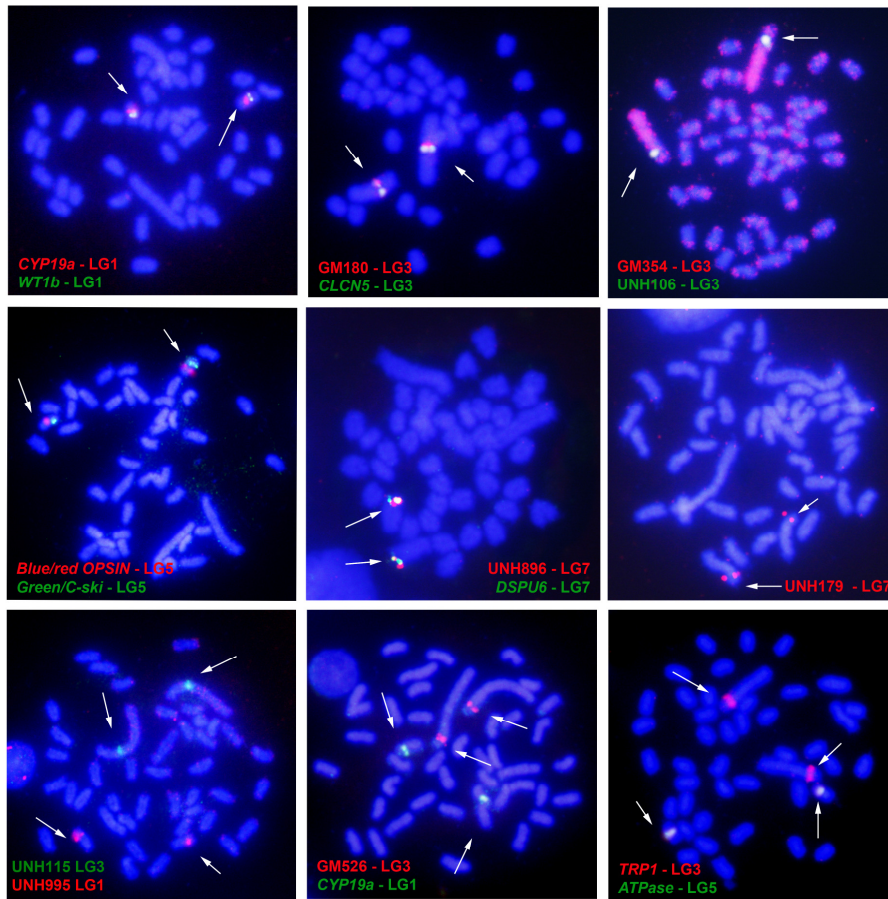

*Oreochromis aureus*

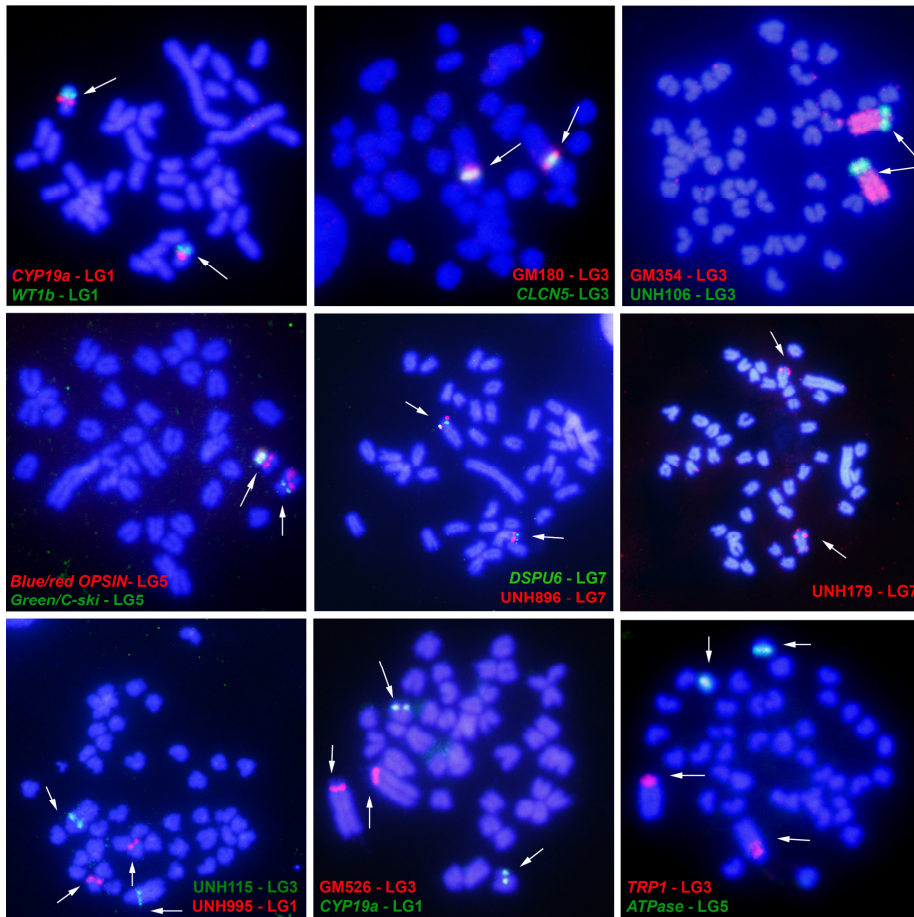

*Tilapia mariae*

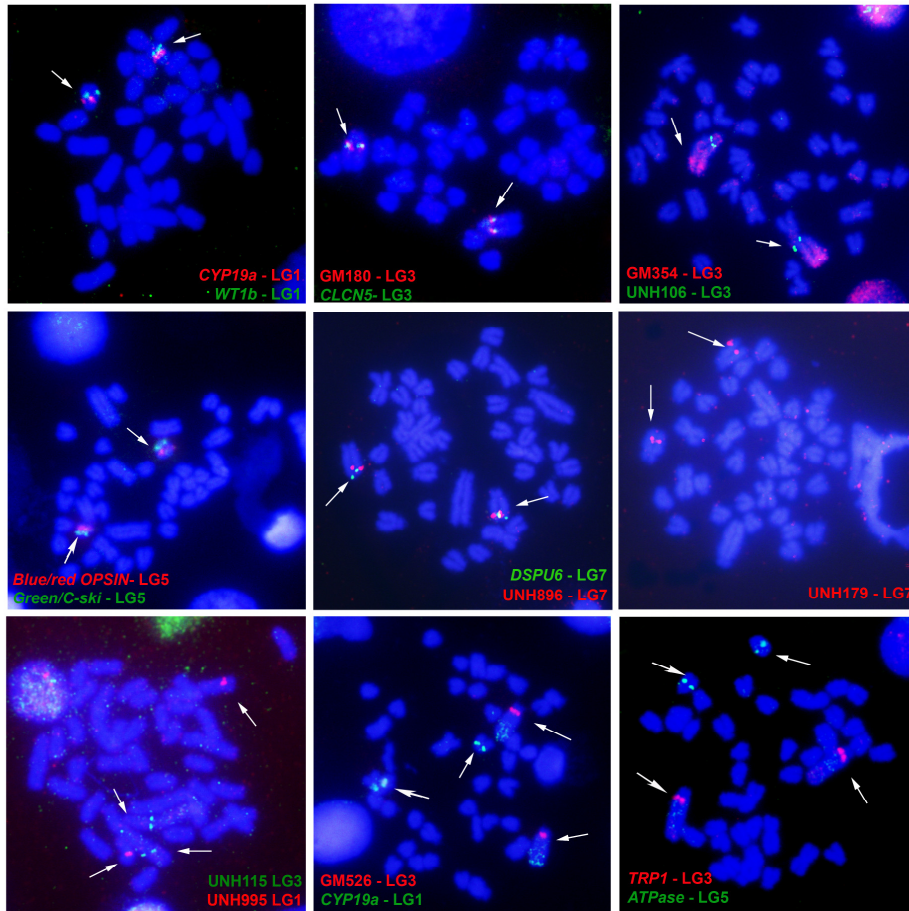

*Astatotilapia latifasciata*

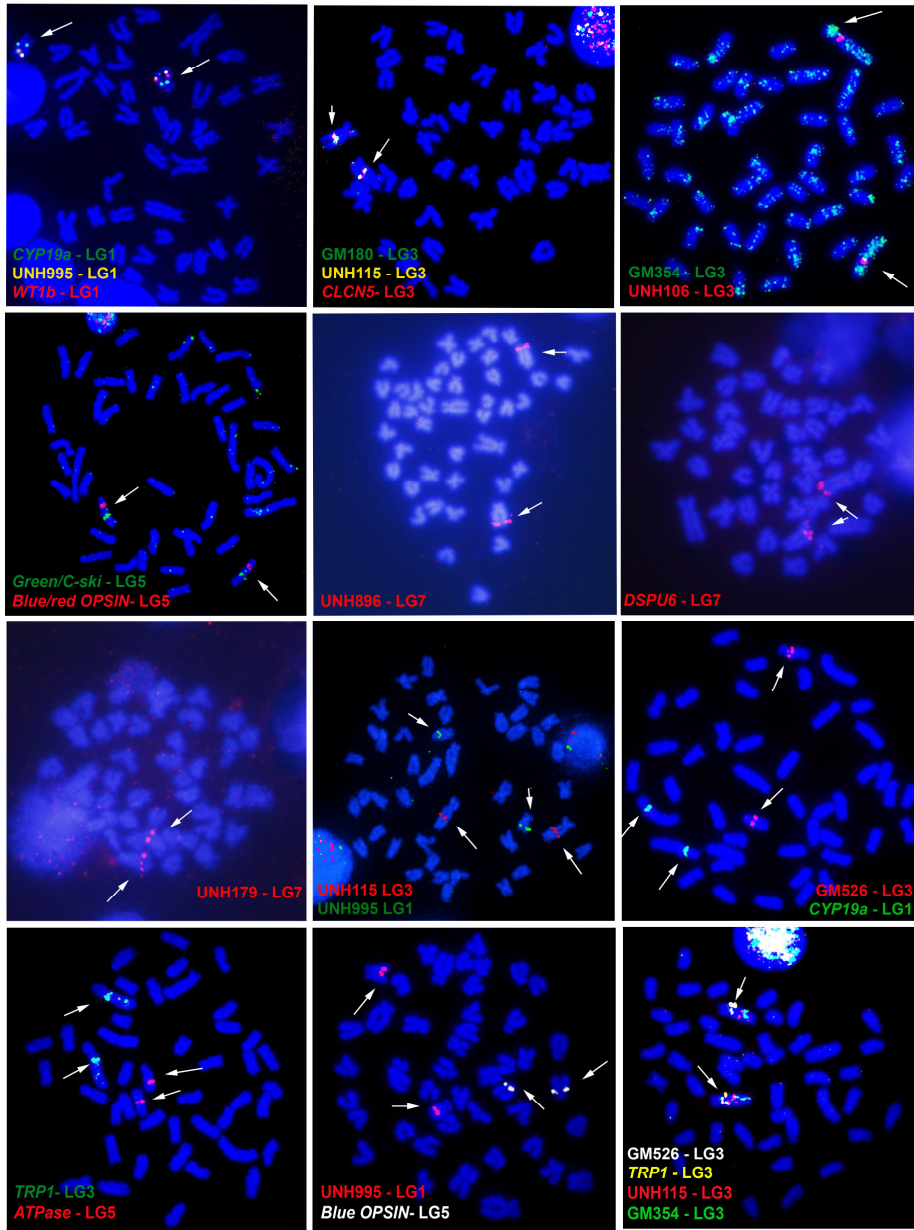

*Metriaclima lombardoi*

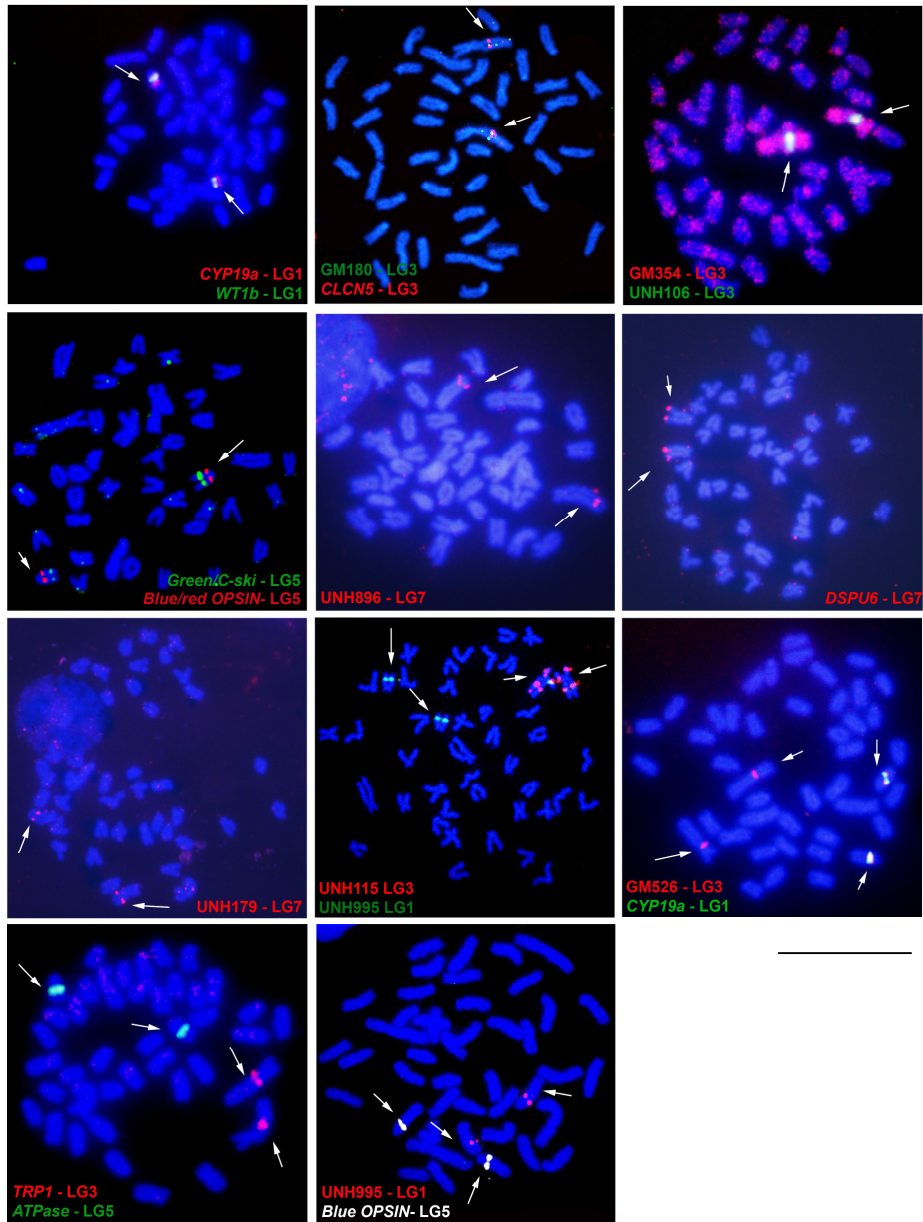

*Astatotilapia burtoni*

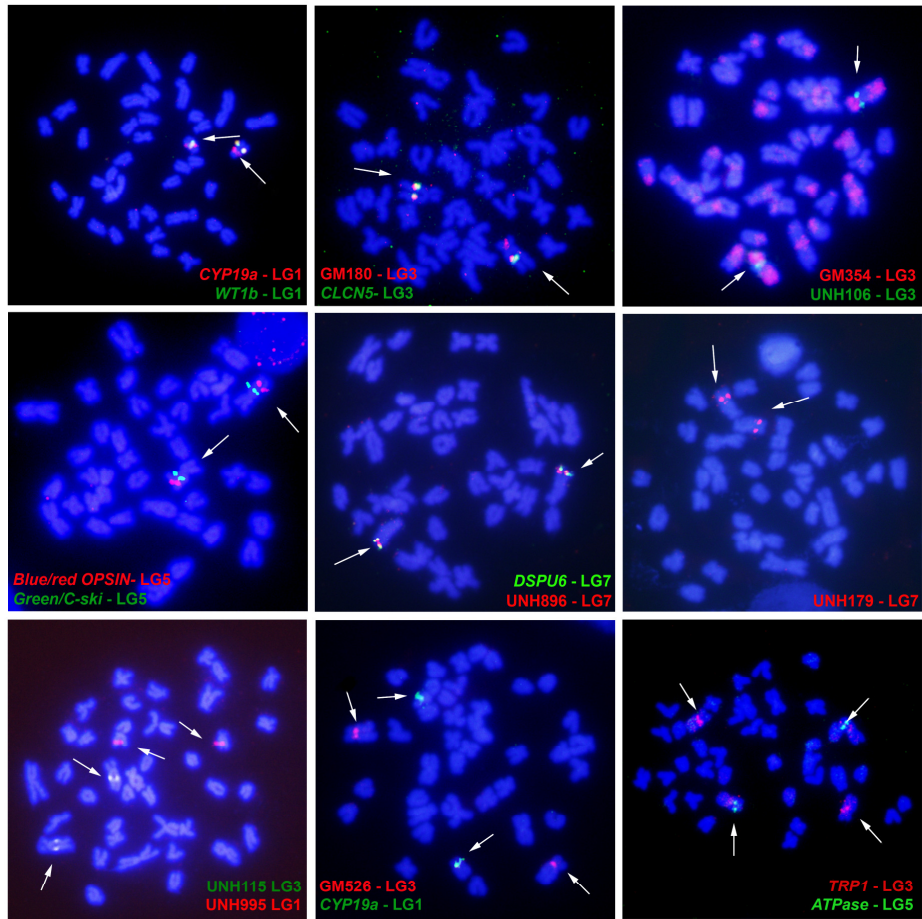

*Labeotropheus trewavasae*

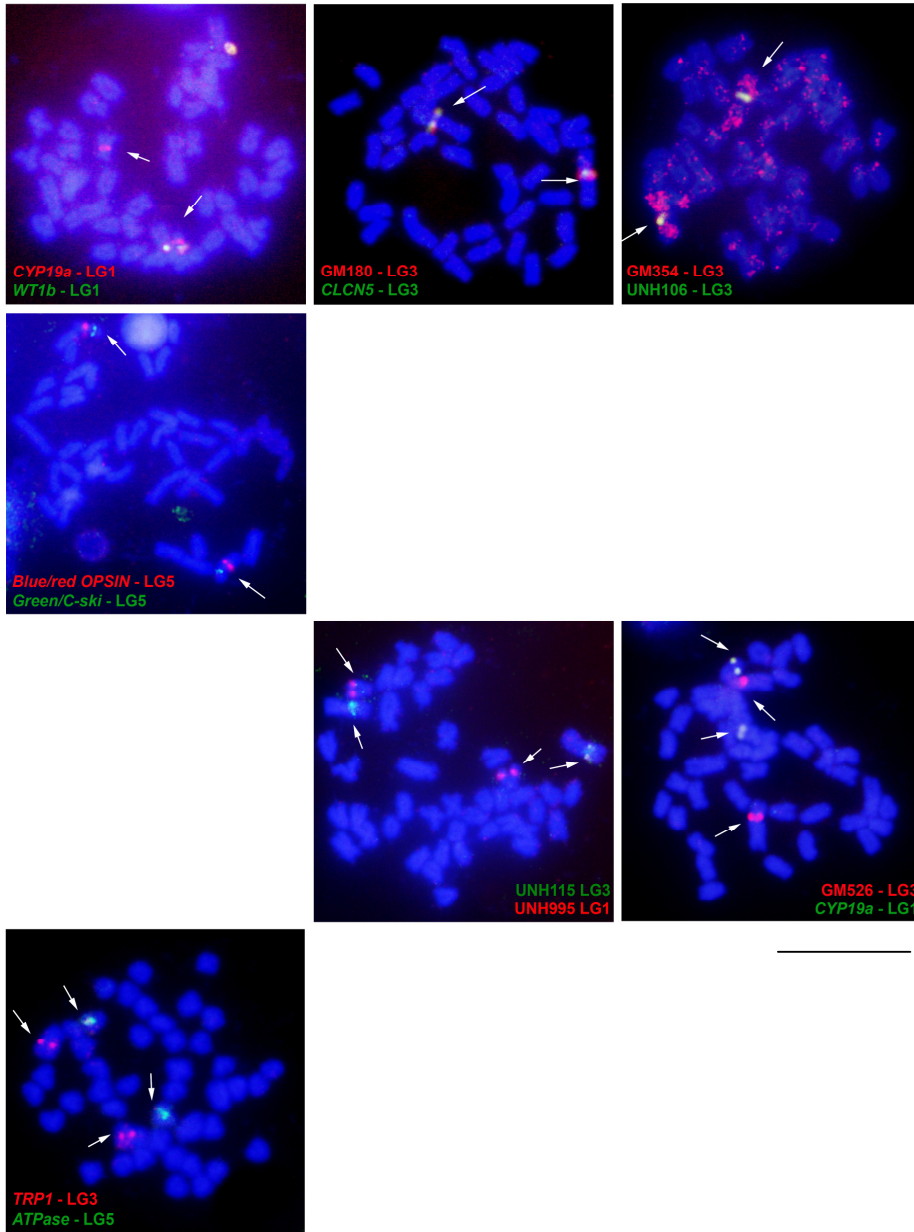



*Hemichromis bimaculatus*

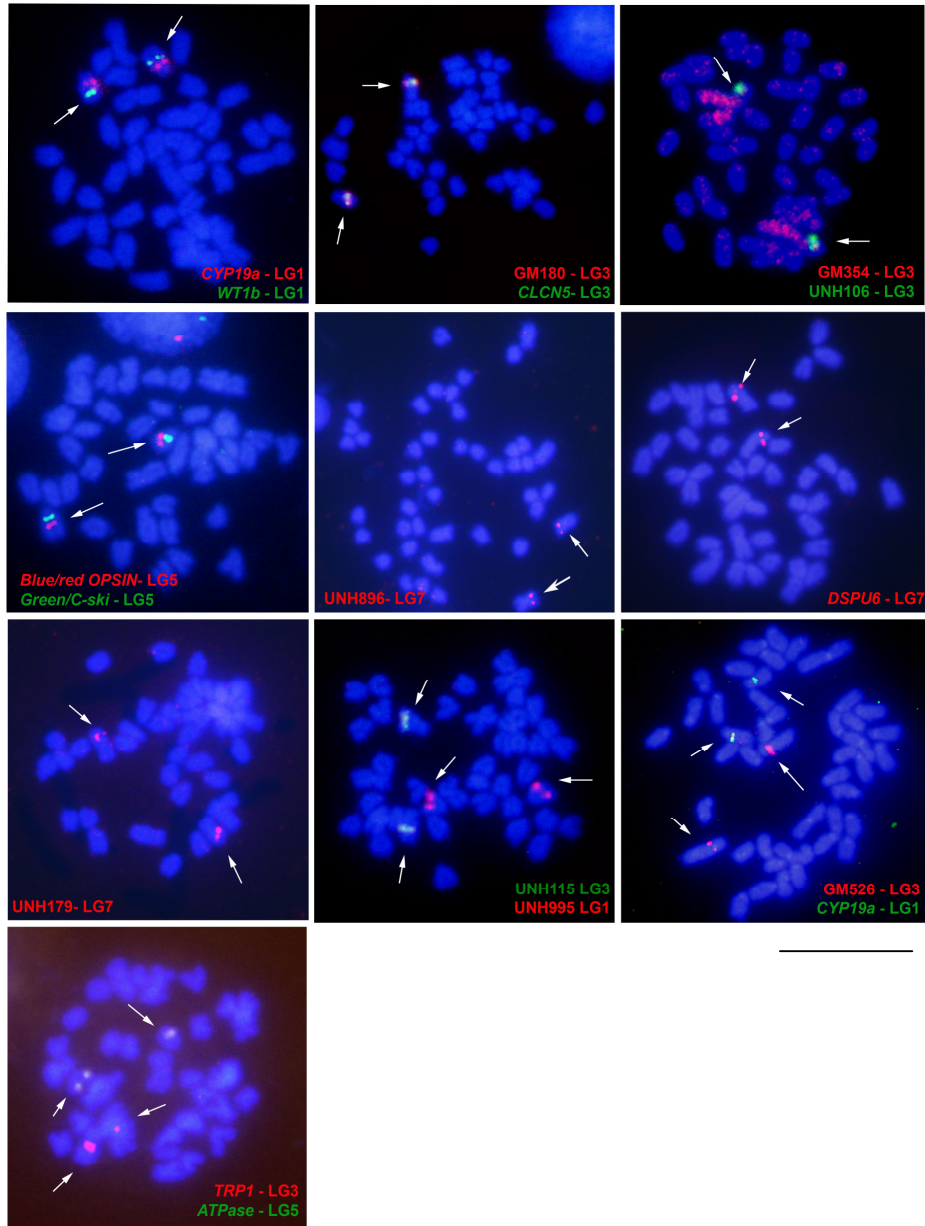

Supplement: 1471-2164-13-463-S1.pdf [file 1471-2164-13-463-S1.pdf]
